# Supplementary material for: Potential Pathogenic and Opportunistic Oral Bacteria in Early Life: The Role of Maternal Factors in a Portuguese Population
Source: MDPI journal article supplement (doi:10.3390/pathogens12010080), 2023-01-03
Supplement: s1 [file s1]

**Supplementary Table S1: Microbial diversity in each type of sample and potential impact of maternal factors.**

| Type of samples     | Maternal factor  | Statistical test; p-value         |
|---------------------|------------------|-----------------------------------|
| Child's oral swab   | Maternal CRF     | Mann-Whitney U test=311.5; p=1.0  |
| Saliva mother       | Maternal CRF     | Mann-Whitney U test=295.5; p=0.8  |
| Breastmilk          | Maternal CRF     | Mann-Whitney U test=232.5; p=0.1  |
| Oral swab diversity | Type of delivery | Mann-Whitney U test=368.0; p=0.05 |
